# Supplementary material
Source: PubMed Central journal article supplement (PMC3491121)
Supplement: NIHMS388977-supplement-supplement_1.pdf [file NIHMS388977-supplement-supplement_1.pdf]

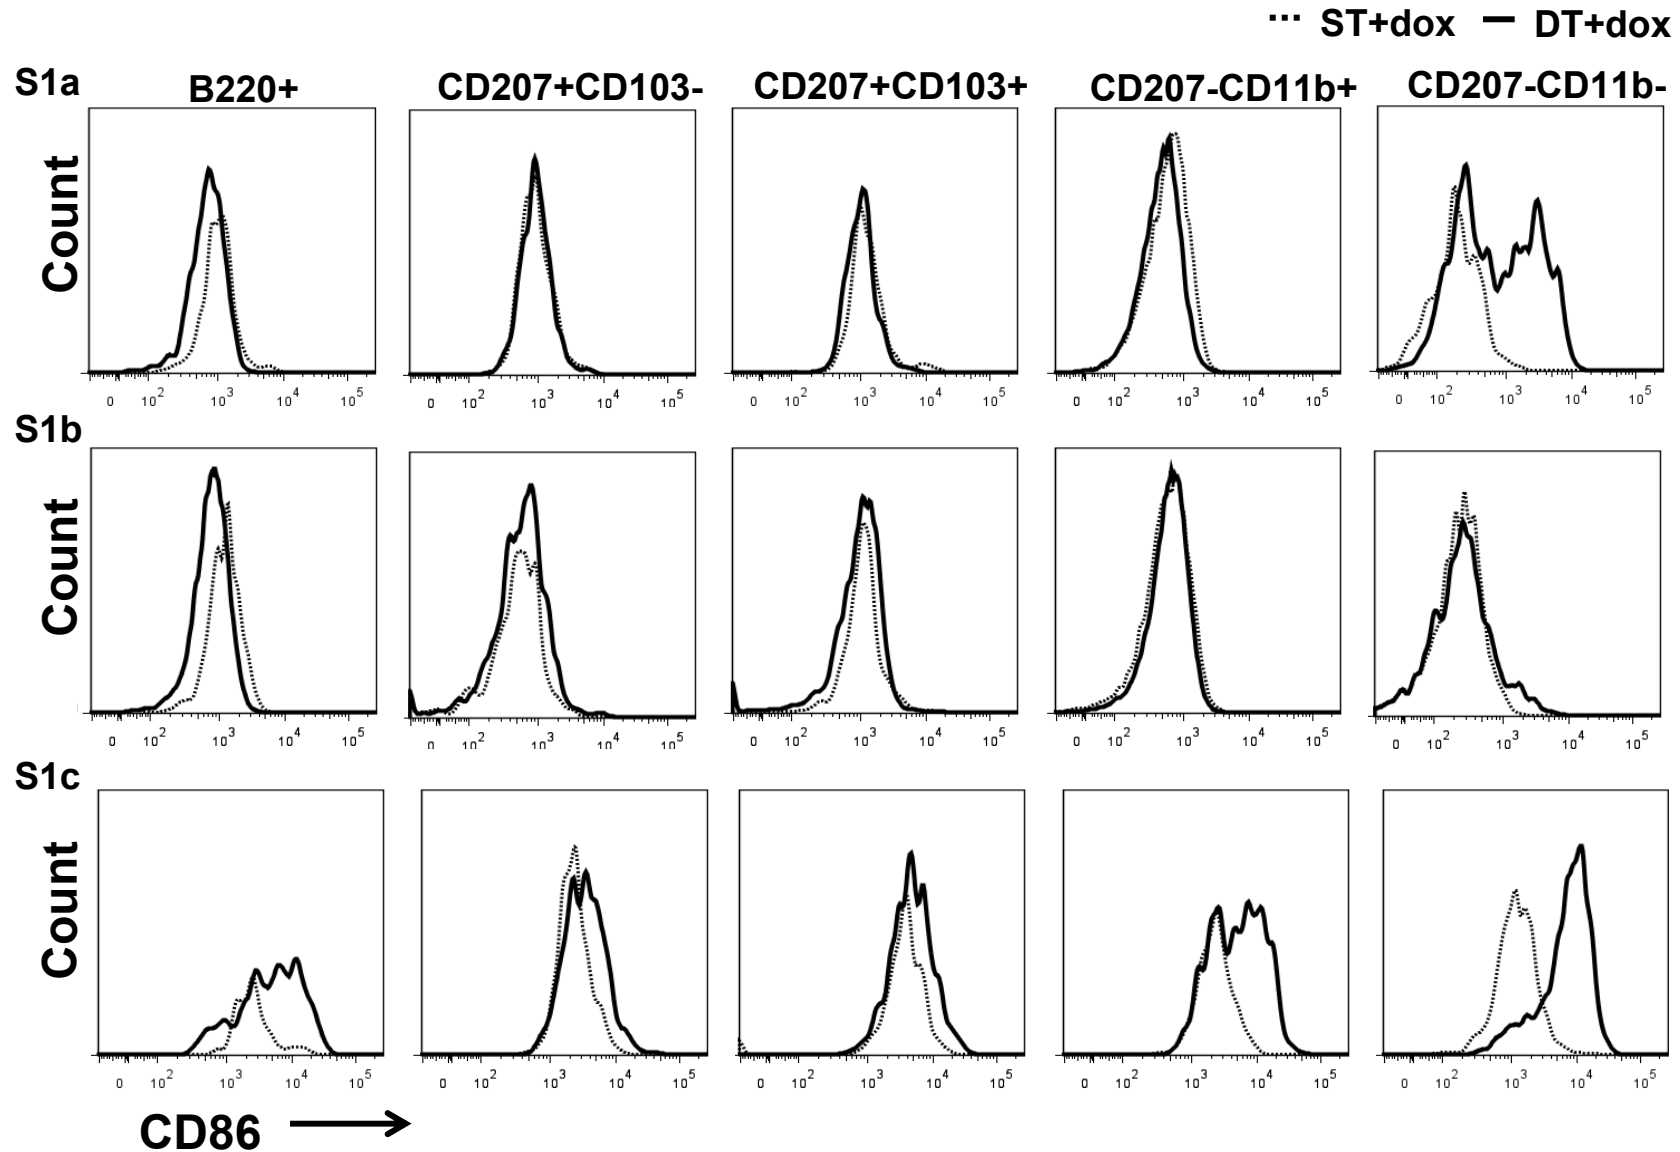

Figure S1. Representative CD86 histograms of various dDC subsets in the dermis following 2 (a) and 4 days (b) of dox treatment. (c) Representative CD86 histograms of various DC subsets harvested from SDLN of ST and DT mice following 2 days of dox treatment.

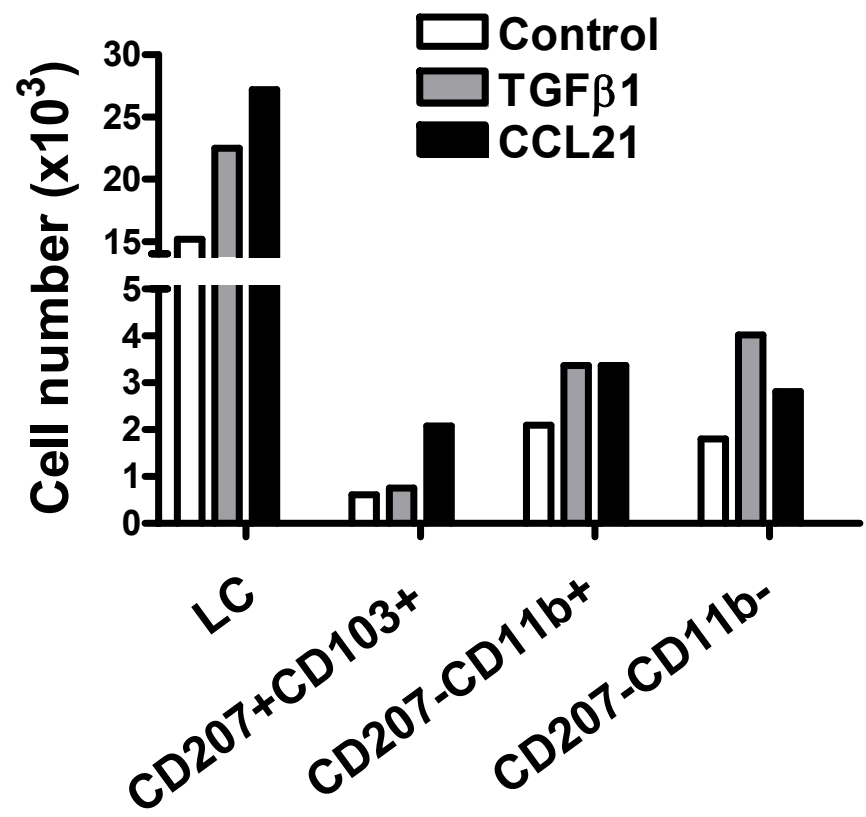

Figure S2. FVB/n mouse ears were split and floated in complete RPMI media containing TGFβ1 or CCL21 and cultured for 48 hrs. Cells accumulating in the media were harvested after 48 hrs, counted, stained for flow cytometric analysis and represented as number of DCs migrating in to the media per ear. Data is representative of 2 independent experiments.

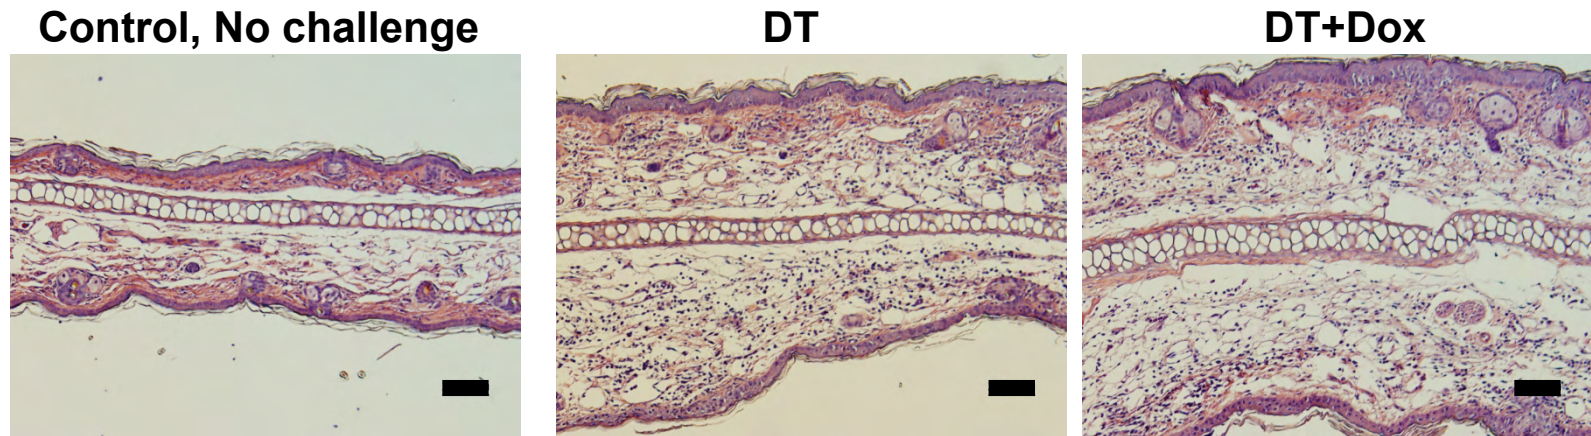

Figure S3. DT mice were injected with either saline or 500 ng/mouse doxycycline 18-24 hrs prior to sensitization with 0.5% DNFB. Mice were challenged on both sides of ear at day 5 using 0.3% DNFB and H&E stained ear histology shown 24 hrs post-challenge. Scale bar = 200 $\mu$ m.
